# Supplementary material for: Influence of linker structure on the anion binding affinity of biscyclopeptides
Source: Royal Society of Chemistry journal article supplement (doi:10.1039/b706932d), 2007-01-01
Supplement: b706932d.pdf [file b706932d.pdf]

## Influence of Linker Structure on the Affinity of Anion Binding Biscyclopeptides

Carsten Reyheller,<sup>a</sup> Benjamin P. Hay,<sup>b</sup> Stefan Kubik,<sup>\*,a</sup>

<sup>a</sup> *Technische Universität Kaiserslautern, Fachbereich Chemie - Organische Chemie, Erwin-Schrödinger-Strasse, D-67663 Kaiserslautern, Germany, Fax: +49-631-205-3921, Email:*

*kubik@chemie.uni-kl.de*

<sup>b</sup> *Oregon Nanoscience and Microtechnologies Institute (ONAMI), Chemical Sciences Division, Pacific Northwest National Laboratory, Richland, Washington 99352*

Structures:

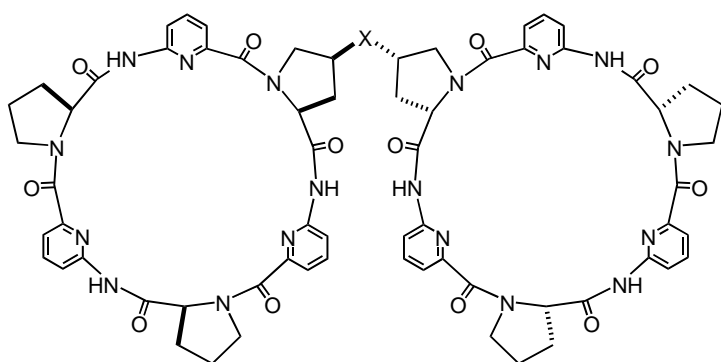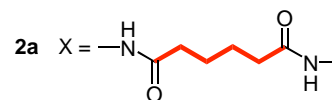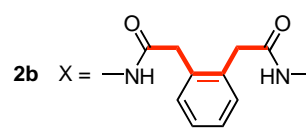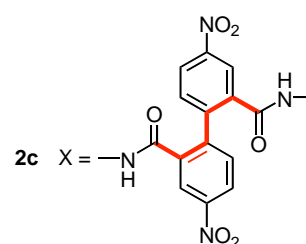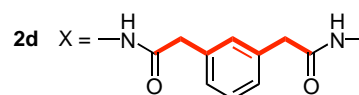

**ITC Experiments:** Concentrations of biscyclopeptides **2b-d** and of salts in the ITC titrations. All salts were used with sodium as counterion.

| receptor  | receptor<br>concentration<br>/ mM | sulphate<br>/ mM | iodide<br>/ mM | bromide<br>/ mM | chloride<br>/ mM |
|-----------|-----------------------------------|------------------|----------------|-----------------|------------------|
| <b>2b</b> | 0.45 mM                           | 14               | 14             | 14              | 40 <sup>a</sup>  |
| <b>2c</b> | 0.25 mM                           | 2.5              | 2.5            | 5               | 15               |
| <b>2d</b> | 0.25 mM                           | 2.5              | 5              | 15              | 40               |

<sup>a</sup> A receptor concentration of 0.5 mM was used in this titration.

$^1\text{H}$  NMR spectrum: **2b** (1 mM) in  $\text{D}_2\text{O}/\text{CD}_3\text{OD}$  1:1 (a), **2b** (1 mM) + 5 equiv of  $\text{Na}_2\text{SO}_4$  in  $\text{D}_2\text{O}/\text{CD}_3\text{OD}$  1:1 (b).

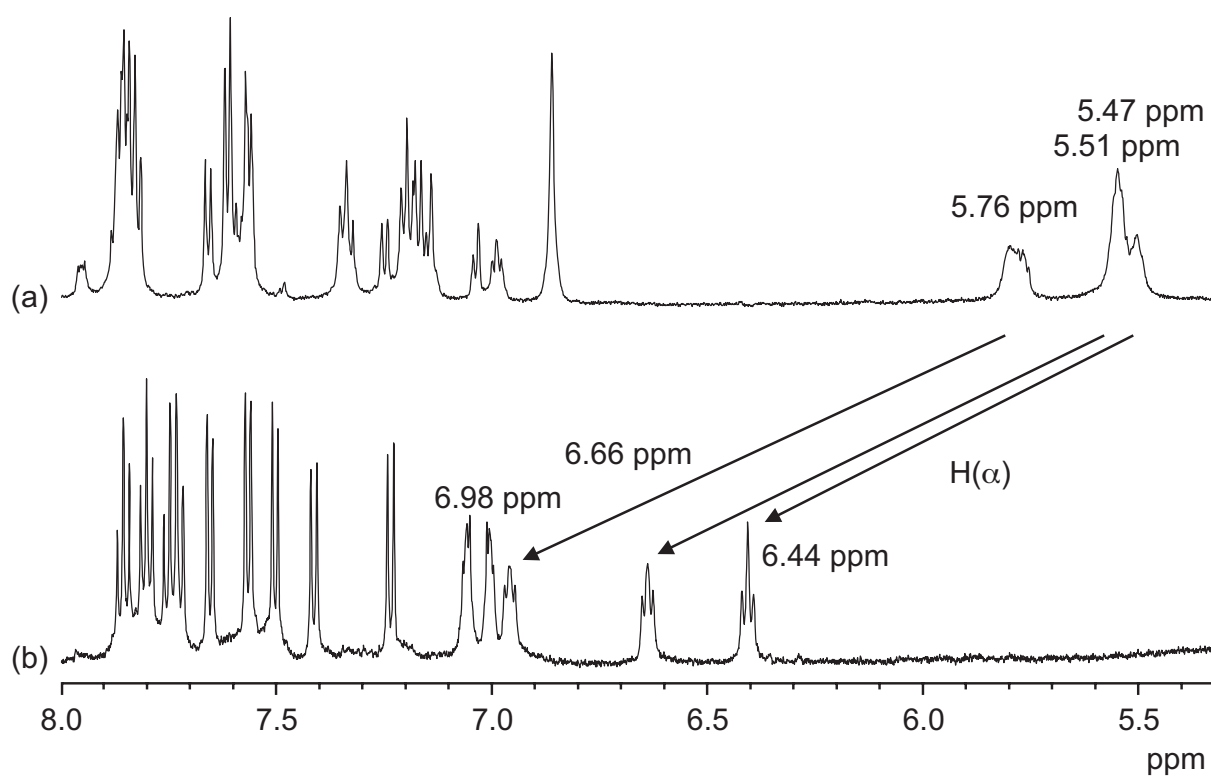

$^1\text{H}$  NMR spectrum: **2c** (1 mM) in  $\text{D}_2\text{O}/\text{CD}_3\text{OD}$  1:1 (a), **2c** (1 mM) + 5 equiv of  $\text{Na}_2\text{SO}_4$  in  $\text{D}_2\text{O}/\text{CD}_3\text{OD}$  1:1 (b).

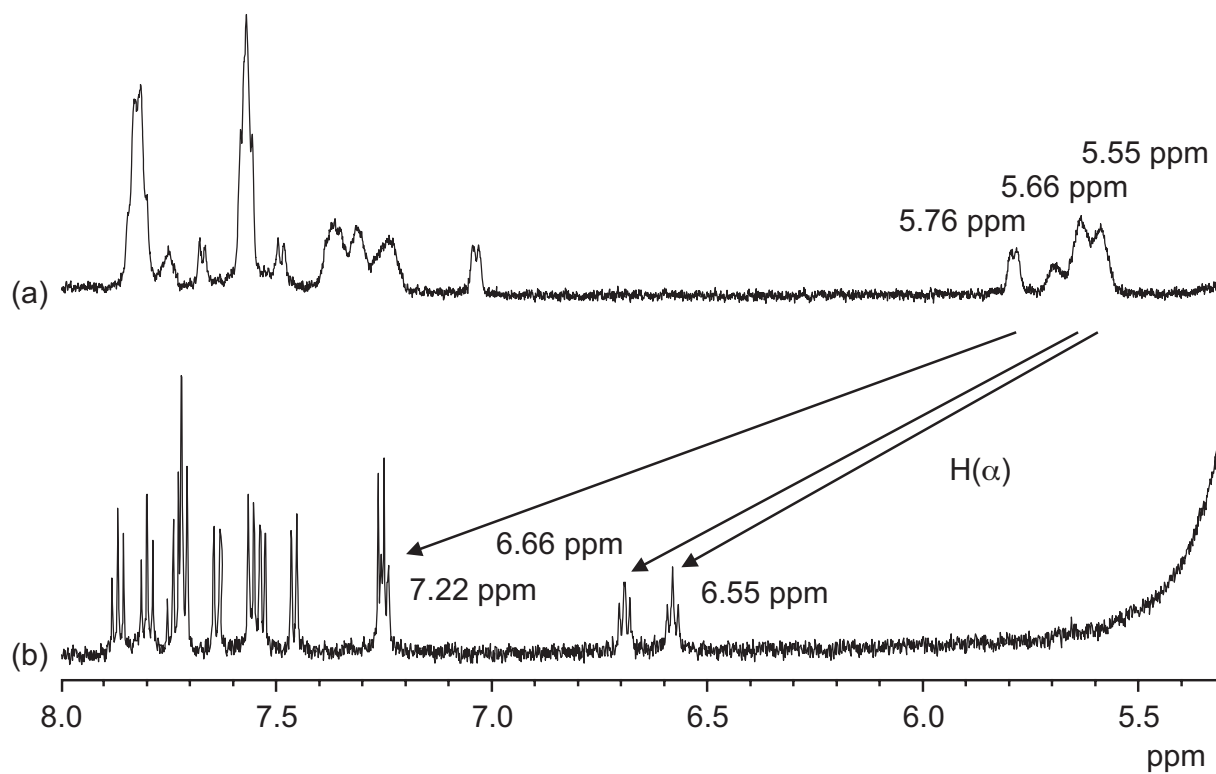

NOESY NMR spectrum: 2b (1 mM) in D<sub>2</sub>O/CD<sub>3</sub>OD 1:1 (mixing time 300 ms) (Bruker Avance 600).

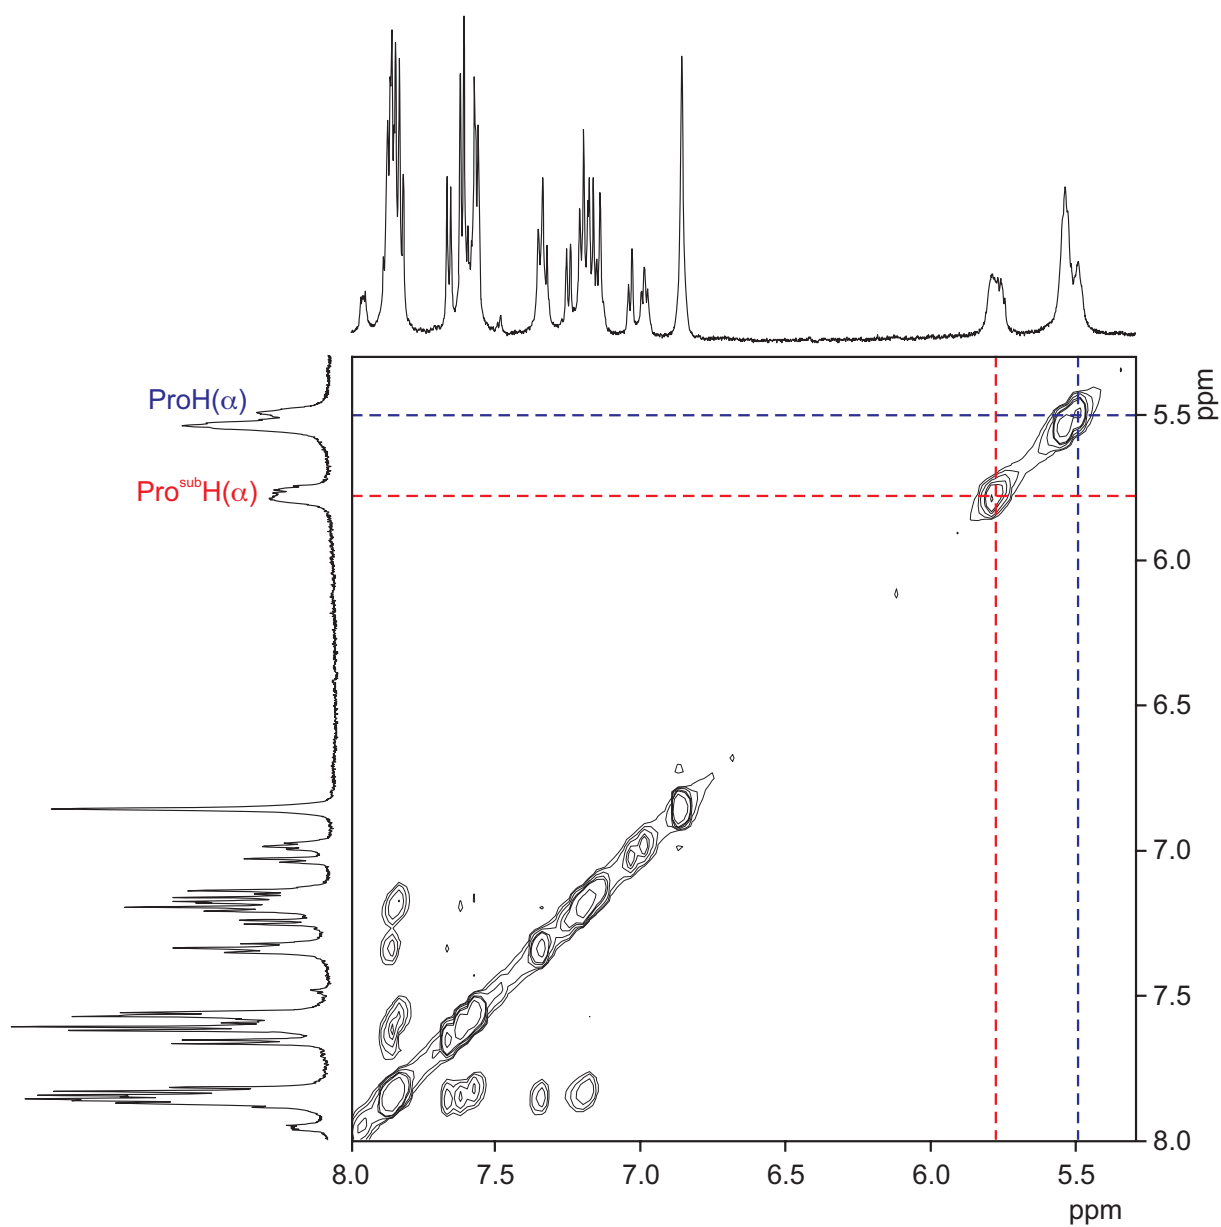

**NOESY NMR spectrum: 2b** (1 mM) + 5 equiv of Na<sub>2</sub>SO<sub>4</sub> in D<sub>2</sub>O/CD<sub>3</sub>OD 1:1 (mixing time 300 ms) (Bruker Avance 600).

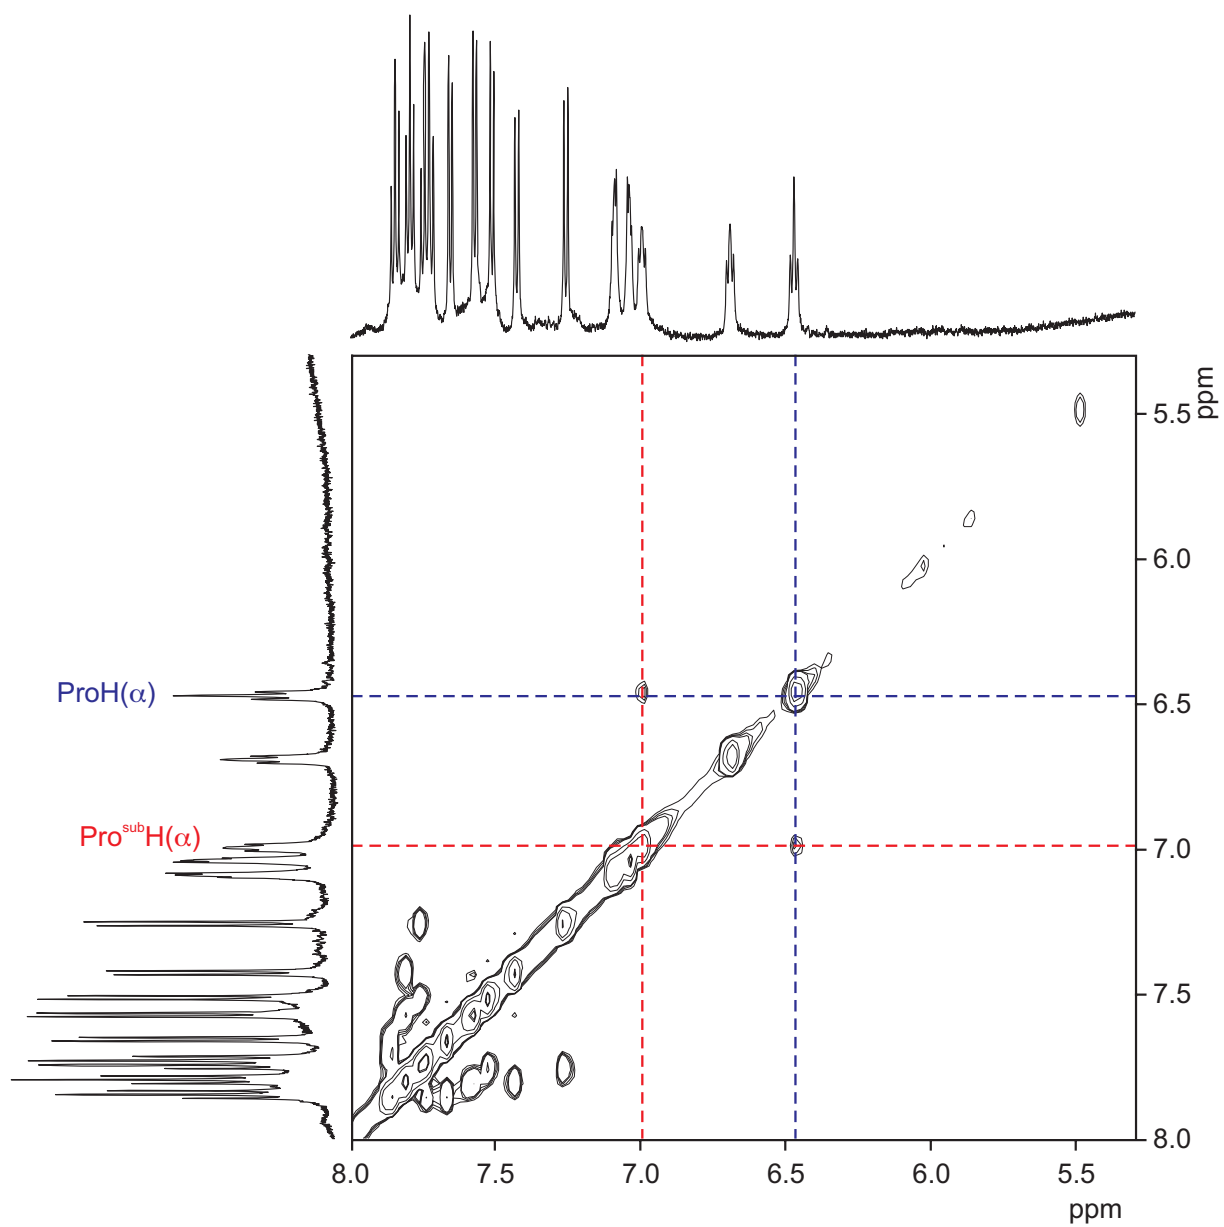

NOESY NMR spectrum: 2c (1 mM) in D<sub>2</sub>O/CD<sub>3</sub>OD 1:1 (mixing time 300 ms) (Bruker Avance 600).

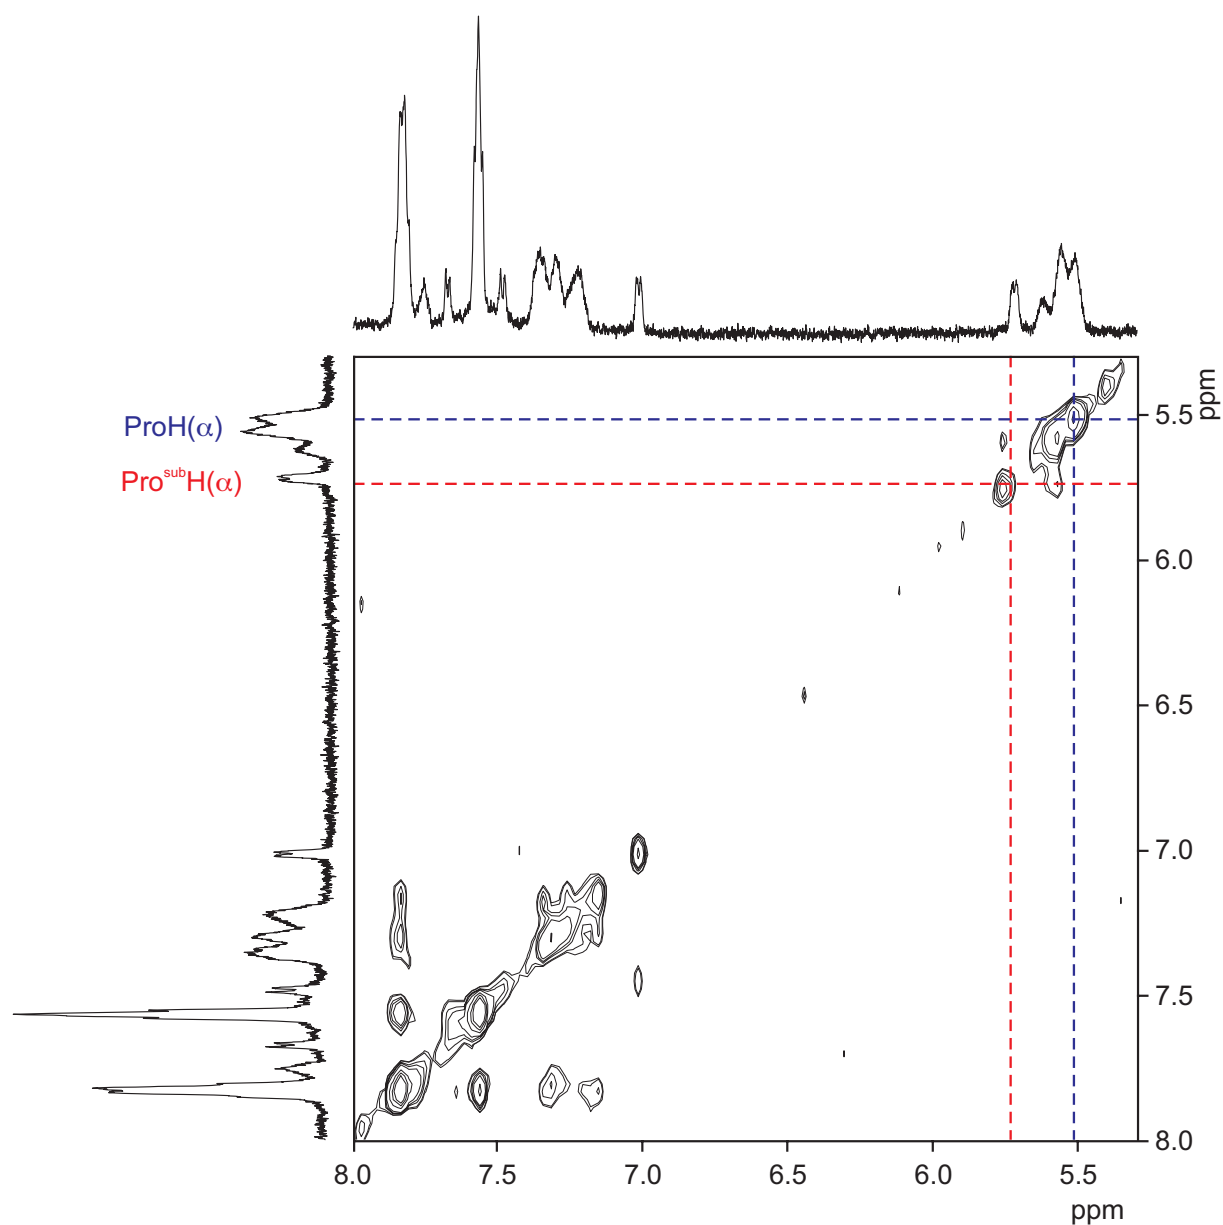

**NOESY NMR spectrum: 2c** (1 mM) + 5 equiv of Na<sub>2</sub>SO<sub>4</sub> in D<sub>2</sub>O/CD<sub>3</sub>OD 1:1 (mixing time 300 ms)

(Bruker Avance 600).

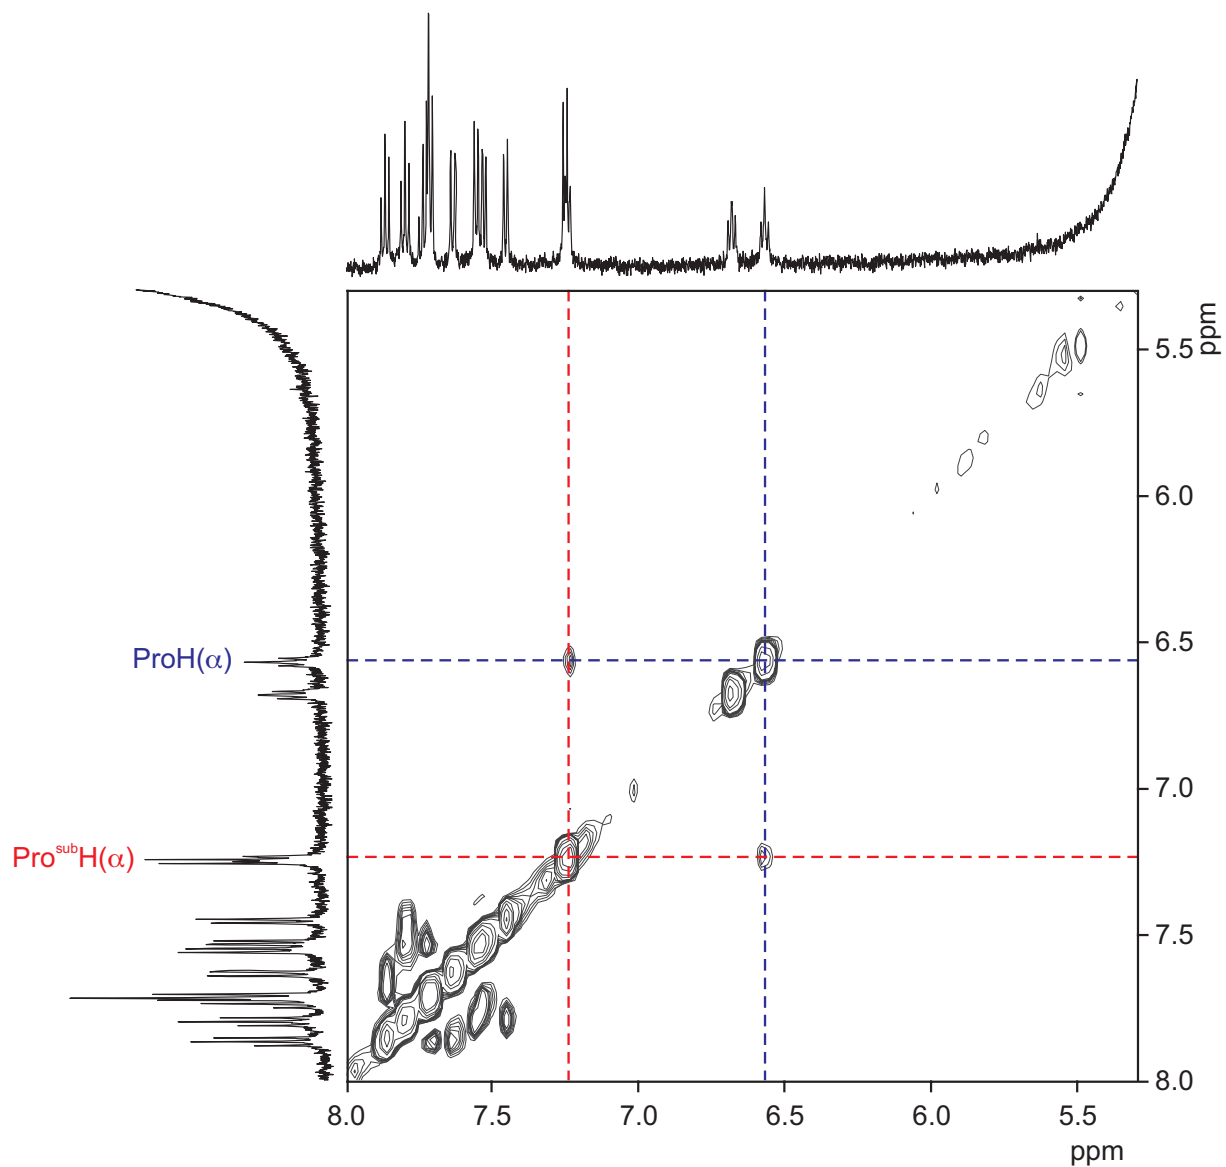



NOESY NMR spectrum: 2d (1 mM) in D<sub>2</sub>O/CD<sub>3</sub>OD 1:1 (mixing time 300 ms) (Bruker Avance 600).

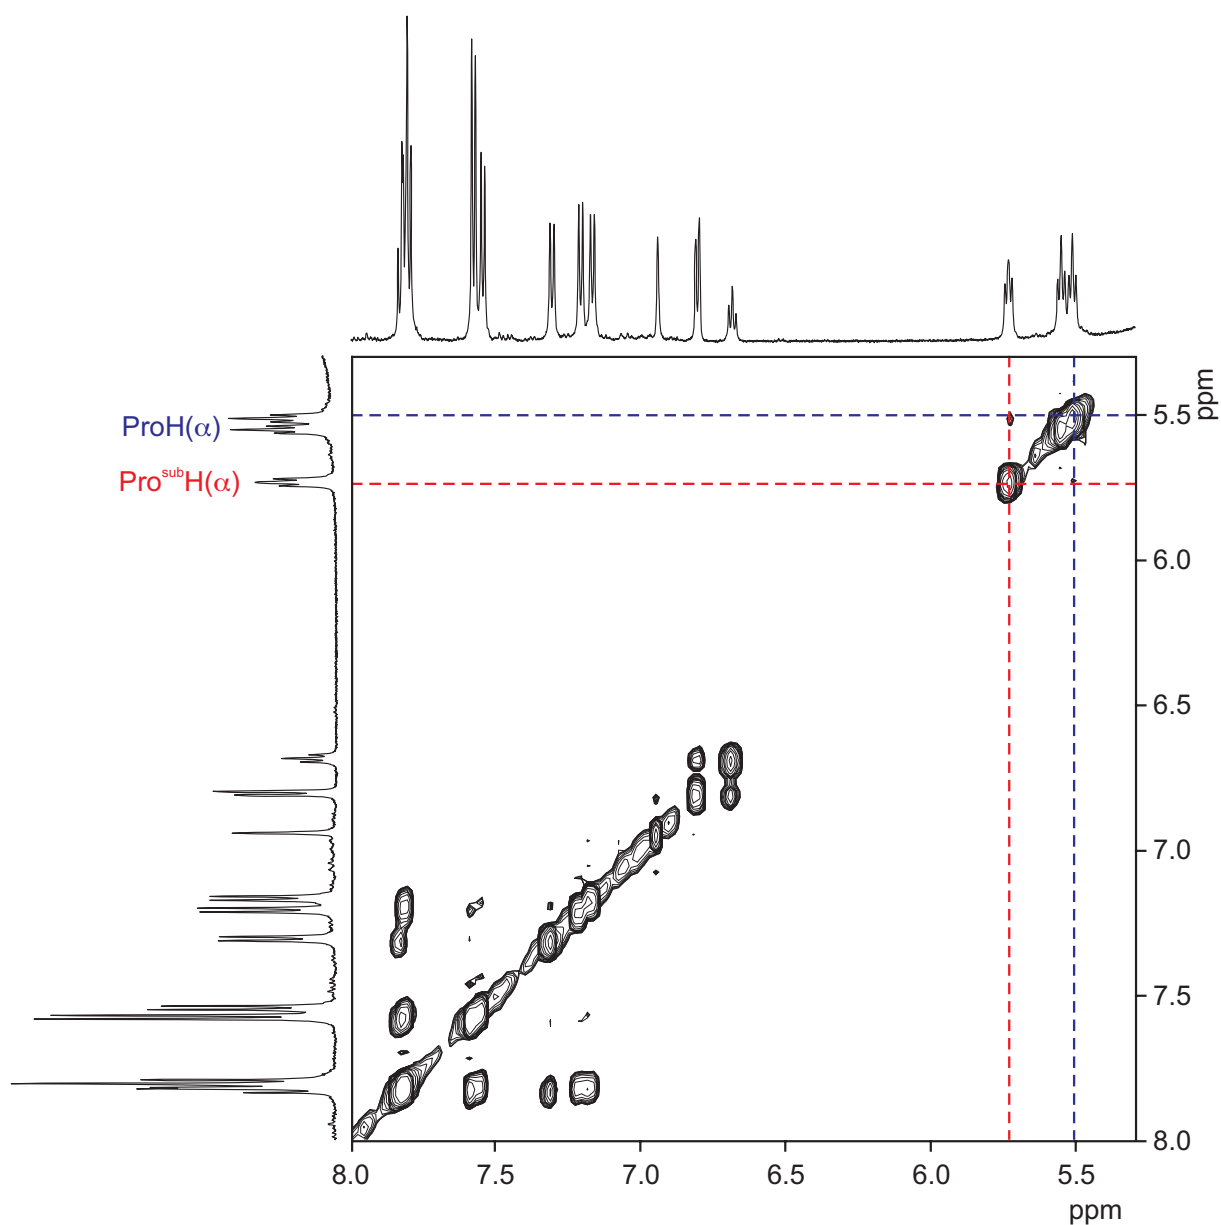

**NOESY NMR spectrum: 2d** (1 mM) + 1 equiv of Na<sub>2</sub>SO<sub>4</sub> in D<sub>2</sub>O/CD<sub>3</sub>OD 1:1 (mixing time 300 ms) (Bruker Avance 600).

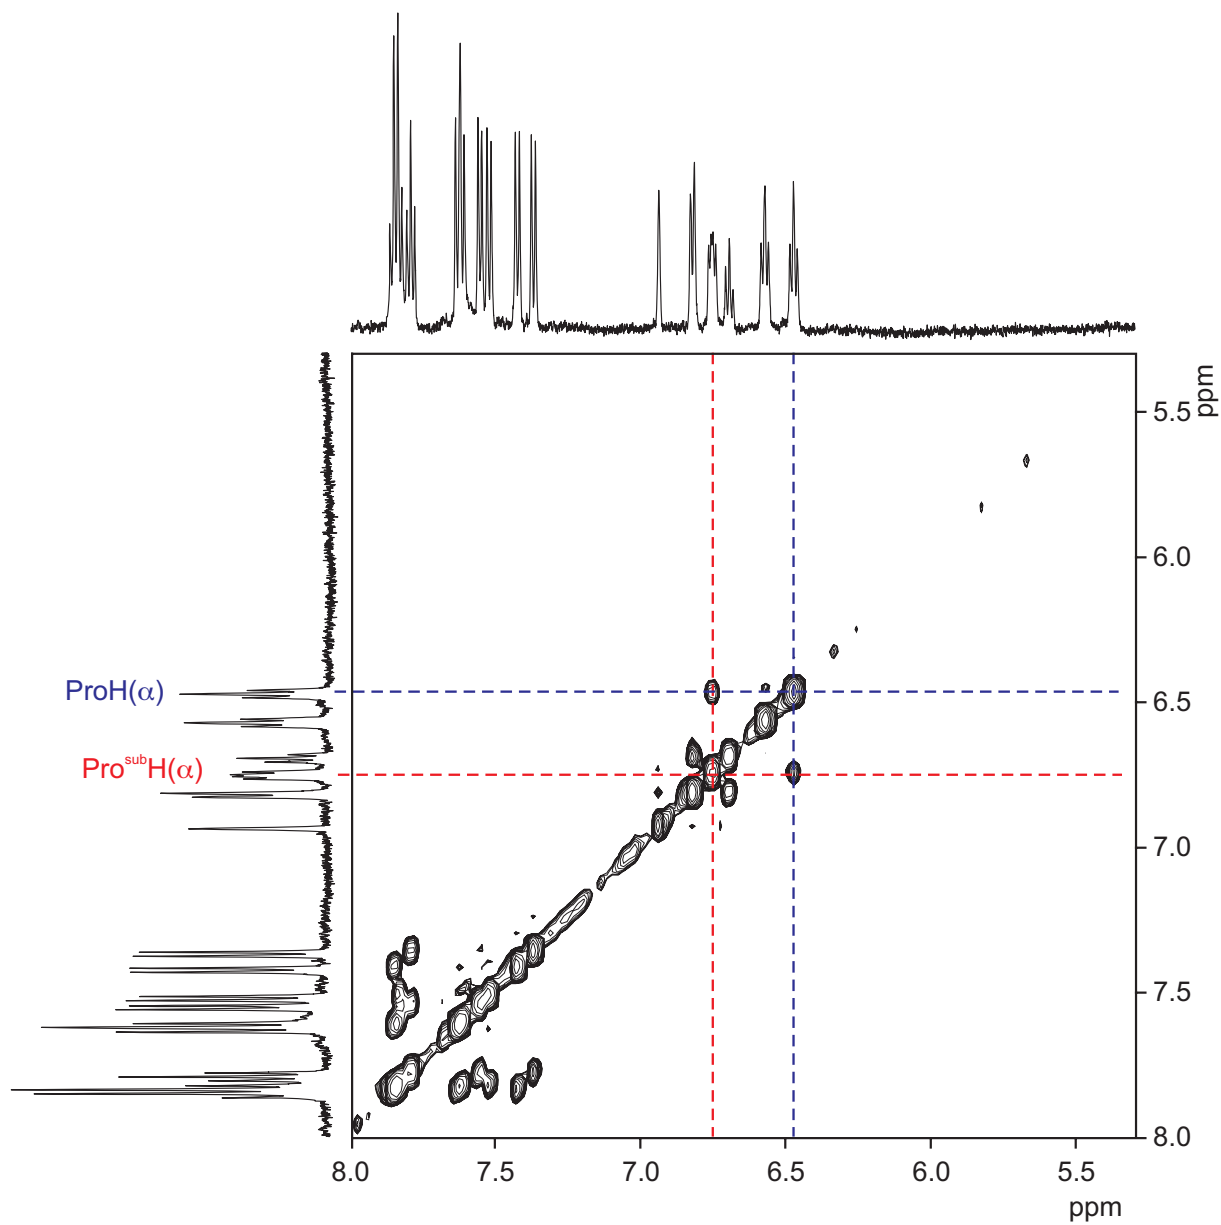

**ESI mass spectrum: 2b** in 1:1 (v/v) water/methanol (0.1 mM) after the addition of 0.33 equivalents of each NaCl, NaBr, and NaI.

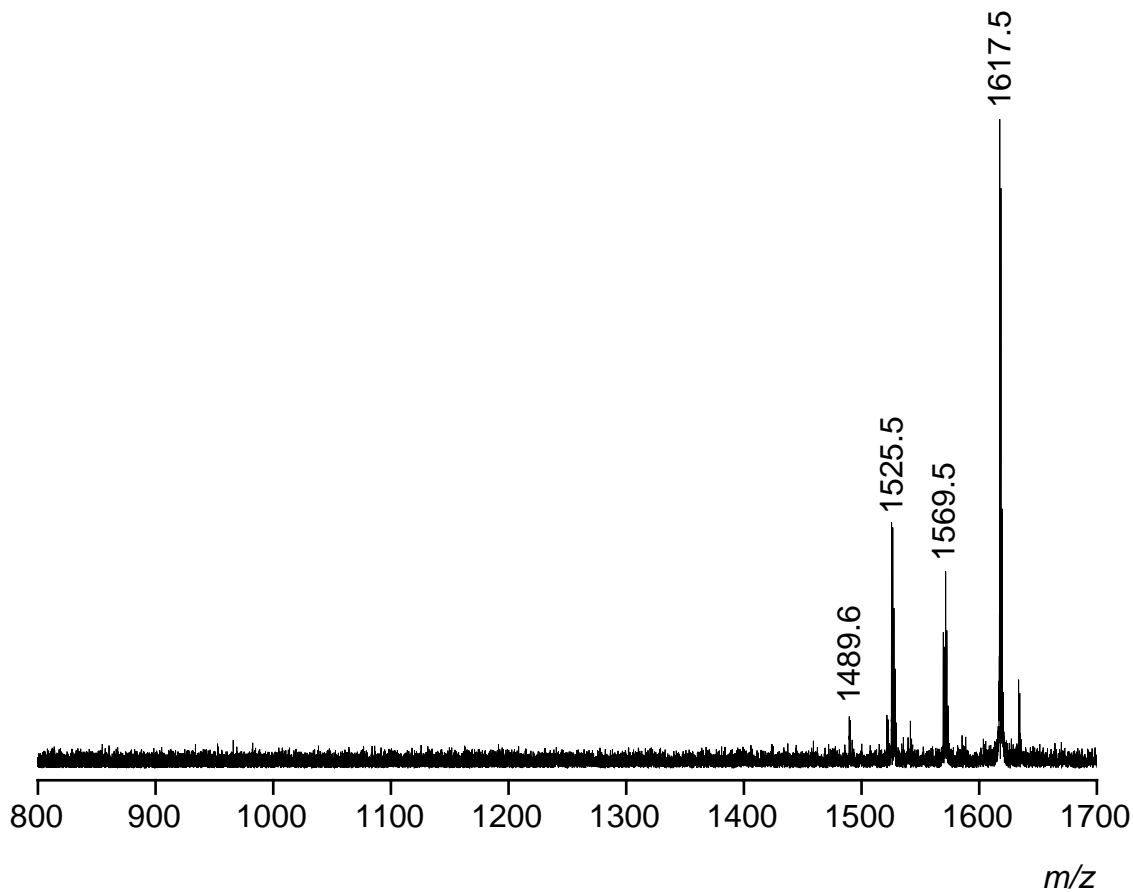

|                             |                                                                      | <i>m/z calcd.</i> | <i>m/z exp.</i> |
|-----------------------------|----------------------------------------------------------------------|-------------------|-----------------|
| <b>2b</b> - H <sup>+</sup>  | C <sub>76</sub> H <sub>73</sub> N <sub>20</sub> O <sub>14</sub>      | 1489.6            | 1489.6          |
| <b>2b</b> + Cl <sup>-</sup> | C <sub>76</sub> H <sub>74</sub> N <sub>20</sub> O <sub>14</sub> · Cl | 1525.5            | 1525.5          |
| <b>2b</b> + Br <sup>-</sup> | C <sub>76</sub> H <sub>74</sub> N <sub>20</sub> O <sub>14</sub> · Br | 1569.5            | 1569.5          |
| <b>2b</b> + I <sup>-</sup>  | C <sub>76</sub> H <sub>74</sub> N <sub>20</sub> O <sub>14</sub> · I  | 1617.5            | 1617.5          |

**ESI mass spectrum: 2c** in 1:1 (v/v) water/methanol (0.1 mM) after the addition of 0.33 equivalents of each NaCl, NaBr, and NaI.

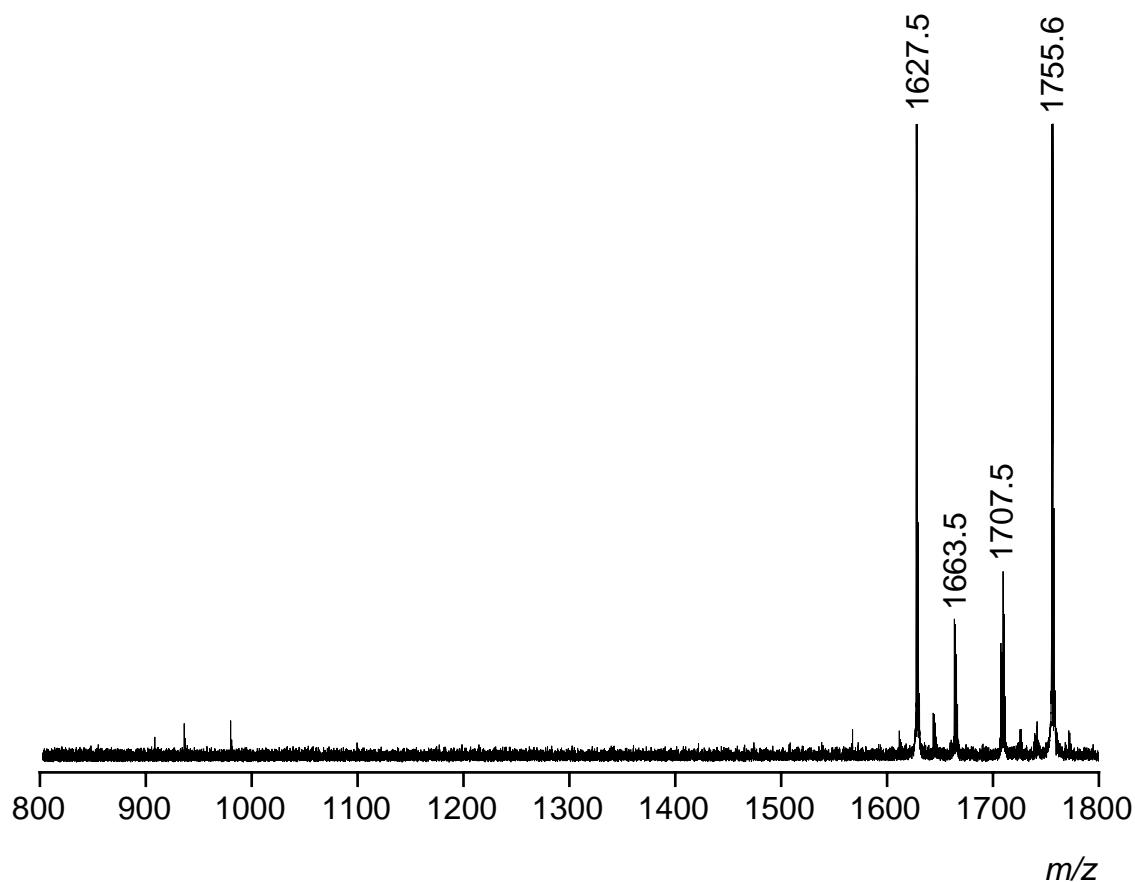

|                             |                                                                      | <i>m/z calcd.</i> | <i>m/z exp.</i> |
|-----------------------------|----------------------------------------------------------------------|-------------------|-----------------|
| <b>2c</b> - H <sup>+</sup>  | C <sub>80</sub> H <sub>71</sub> N <sub>22</sub> O <sub>18</sub>      | 1627.5            | 1627.5          |
| <b>2c</b> + Cl <sup>-</sup> | C <sub>80</sub> H <sub>72</sub> N <sub>22</sub> O <sub>18</sub> · Cl | 1663.5            | 1663.5          |
| <b>2c</b> + Br <sup>-</sup> | C <sub>80</sub> H <sub>72</sub> N <sub>22</sub> O <sub>18</sub> · Br | 1707.5            | 1707.5          |
| <b>2c</b> + I <sup>-</sup>  | C <sub>80</sub> H <sub>72</sub> N <sub>22</sub> O <sub>18</sub> · I  | 1755.4            | 1755.6          |
